# Supplementary material
Source: publisher site journal article supplement (https://www.dovepress.com/get_supplementary_file.php?f=256217.docx)
Supplement: Supplementary file 1 [file get_supplementary_file.php]

**Supplementary Table 1: List of Ethics Committee for any Investigational Center and of Coinvestigators**

| **Investigator** | **Ethics Committee** |
| --- | --- |
| Antonini Angelo | Comitato Etico per la Sperimentazione Clinica della Provincia Di Venezia e IRCCS San Camillo c/o Azienda ULSS 12 Veneziana |
| Solla Paolo | Comitato Etico Indipendente Azienda Ospedaliero Universitaria di Cagliari |
| Defazio Giovanni | Comitato Etico indipendente Locale Segreteria Scientifica c/o Servizio di Farmacia |
| Fabbrini Giovanni | Comitato Etico dell’Università Sapienza |
| Lopiano Leonardo | Comitato Etico Interaziendale A.O.U. Città della Salute e della Scienza di Torino A.O. Ordine Mauriziano – A.S.L. TO1 |
| Marano Pietro | Comitato Etico A.O. di Rilievo Nazionale e di Alta Specializzazione “Garibaldi” |
| Modugno Nicola | Comitato Etico dell’IRCSS Istituto Neurologico Mediterraneo Neuromed di Pozzilli |
| Canesi Margherita | CENTRAL: Segreteria del Comitato Etico MILANO AREA C c/o Ospedale Niguarda Cà Granda |
| Pontieri Francesco | Comitato Etico dell’Università Sapienza |
| Quatrale Rocco | Comitato Etico per la Sperimentazione Clinica della Provincia Di Venezia e IRCCS San Camillo c/o Azienda ULSS 12 Veneziana |
| Sensi Mariachiara | Comitato Etico Interaziendale di Area Vasta Bologna-Imola-Ferrara Segreteria Amministrativa c/o Ufficio Ricerca e Innovazione A.O.U. di Ferrara |
| Tambasco Nicola | Comitato Etico delle Aziende Sanitarie dell`Umbria di Perugia |
| Tessitore Alessandro | Comitato Etico S.U.N. – A.O. dei Colli c/o A.O.U. – S.U.N. |

**List of Co-Investigators at participating Centers**

- Montanaro Elisa, Zibetti Maurizio, University of Torino, Azienda Ospedaliero-Universitaria Città della Salute e della Scienza di Torino
- Latino Pamela, Pellicano Clelia, Department NESMOS, “Sapienza” University, Sant’Andrea Hospital, IRCCS Fondazione Santa Lucia, Roma
- Simoni Simone, Department of Neurology, Perugia General Hospital and University of Perugia
- De Mase Antonio, De Micco Rosa, I Neurology Unit, Second University of Napoli SUN
- Rispoli Vittorio, Neurology Unit, Hospital Sant’Anna Ferrara
- Seminara Maria Rosaria, UOC di Med Fis e Riab. PO Biancavilla ASP 203 Catania
- Pompanin Sara, Scaravilli Tomaso, Neurology Unit, Hospital dell’Angelo, Mestre (VE)
- Olivola Enrica, Cerrone Gloria, Neurology Unit, IRCC Neuromed Pozzilli
- Gasparoli Elisabetta, IRCCS San Camillo, Venezia
- Russo Francesco Paolo, Gastroenterology Unit, University of Padova
- Ranghetti Alessandra, Centro Parkinson CTO Milano
- Latorre Anna, Department Human Neurosciences Sapienza University of Rome
